# Supplementary material
Source: publisher figshare collection journal article supplement (https://geolsoc.figshare.com/articles/dataset/_/3453263)
Supplement: Supplementary file 1 [file 1]

Compilation of Ar–Ar and K–Ar ages for the South Atlantic post-break-up magmatism

| Age (Ma) | error | Method    | mineral/rock                         | Comment                                       | Lat (S) | Long   | Reference                                                                                                                                                                                                                                                                |
|----------|-------|-----------|--------------------------------------|-----------------------------------------------|---------|--------|--------------------------------------------------------------------------------------------------------------------------------------------------------------------------------------------------------------------------------------------------------------------------|
| 0.58     | 0.1   | 40Ar/39Ar | whole rock/basalt                    | AG51-3-6, Gough Island dredge sample; plateau | 40.3    | -10    | O'Connor & le Roex (1992) South Atlantic hot spot-plume systems. 1: distribution of volcanism in time and space. Earth and Planetary Science Letters, 113, 343–364.                                                                                                      |
| 1.50     |       | 40Ar/39Ar | whole rock/melanephelinites          | Fm Quixaba (Fernão de Noronha island)         | 3.51    | -32.25 | CBPM/IRD, Salvador, 1–24.                                                                                                                                                                                                                                                |
| 2.60     | 0.6   | 40Ar/39Ar | plagioclase/altered basalt           | SO84 60DS-2; isochron; Josephine Seamount     | 16.25   | -9     | O'Connor & le Roex (1992)                                                                                                                                                                                                                                                |
| 2.90     |       | 40Ar/39Ar | whole rock/melanephelinites          | Fm Remédios (Fernão de Noronha island)        | 3.51    | -32.25 | Cordani et al. (2003) Cenozoic alkaline volcanism of Fernando de Noronha island. In: South American Symposium on Isotope Geology. Field Trip Guide.                                                                                                                      |
| 3.00     |       | K-Ar      | whole rock/melanephelinites          | Fm Quixaba (Fernão de Noronha island)         | 3.51    | -32.25 | Cordani (1970) Idade do vulcanismo no Oceano Atlântico Sul. Boletim de Instituto de Geociência e Astronomia da Universidade de São Paulo, São Paulo, 1, 9–75.                                                                                                            |
| 3.40     | 2.8   | K-Ar      | whole rock/mod altered volcanic rock | TG-A-01, Cameroon Line, Tinhosa Granda Island | -1.33   | 7.27   | O'Connor & le Roex (1992)                                                                                                                                                                                                                                                |
| 4.20     |       | 40Ar/39Ar | whole rock/melanephelinites          | Fm Quixaba (Fernão de Noronha island)         | 3.51    | -32.25 | Cordani et al. (2003)                                                                                                                                                                                                                                                    |
| 6.60     | 0.2   | 40Ar/39Ar | whole rock/basalt                    | SO84 7DS-1; isochron; Circe Seamount          | 8.2     | -9.3   | O'Connor & le Roex (1992)                                                                                                                                                                                                                                                |
| 7.50     | 1     | 40Ar/39Ar | plagioclase/altered lava             | SO84 53DS-1; isochron; Benjamin Seamount      | 16.2    | -8.5   | O'Connor & le Roex (1992)                                                                                                                                                                                                                                                |
| 8.20     | 0.1   | 40Ar/39Ar | whole rock/trachyte                  | AG51-7-1, McNish seamount                     | 40.17   | -8.55  | O'Connor & le Roex (1992)                                                                                                                                                                                                                                                |
| 10.30    | 0.6   | 40Ar/39Ar | plagioclase/altered lava             | SO84 43DS-1; Kutzov Seamount                  | 15.1    | -8.4   | O'Connor & le Roex (1992)                                                                                                                                                                                                                                                |
| 10.80    |       | K-Ar      | whole rock/alkali trachyte           | Fernão de Noronha island                      | 3.51    | -32.25 | Cordani (1970) Idade do vulcanismo no Oceano Atlântico Sul. Boletim de Instituto de Geociência e Astronomia da Universidade de São Paulo, São Paulo, 1, 9–75.                                                                                                            |
| 11.20    |       | K-Ar      | whole rock/phonolite                 | Fernão de Noronha island                      | 3.51    | -32.25 | Cordani (1970)                                                                                                                                                                                                                                                           |
| 12.30    |       | K-Ar      | whole rock/alkali basalt             | Fernão de Noronha island                      | 3.51    | -32.25 | Cordani (1970)                                                                                                                                                                                                                                                           |
| 14.20    | 1.2   | 40Ar/39Ar | plagioclase/altered lava             | SO84 68DS-6; Bonaparte Seamount               | 15.5    | -7     | O'Connor & le Roex (1992)                                                                                                                                                                                                                                                |
| 14.50    | 1     | 40Ar/39Ar | plagioclase/altered lava             | SO84 68DS-2; Bonaparte Seamount               | 15.5    | -7     | O'Connor & le Roex (1992)                                                                                                                                                                                                                                                |
| 14.90    | 0.2   | 40Ar/39Ar | plagioclase/altered lava             | SO84 68DS-5; Bonaparte Seamount               | 15.5    | -7     | O'Connor & le Roex (1992)                                                                                                                                                                                                                                                |
| 15.10    | 0.1   | 40Ar/39Ar | plagioclase/altered lava             | SO84 68DS-2; Bonaparte Seamount               | 15.5    | -7     | O'Connor & le Roex (1992)                                                                                                                                                                                                                                                |
| 15.10    | 0.4   | 40Ar/39Ar | plagioclase/altered lava             | M16/1-6; Bonaparte Seamount                   | 15.5    | -7     | O'Connor & le Roex (1992)                                                                                                                                                                                                                                                |
| 15.10    | 1     | 40Ar/39Ar | plagioclase/altered lava             | M16/1-1; Bonaparte Seamount                   | 15.5    | -7     | O'Connor & le Roex (1992)                                                                                                                                                                                                                                                |
| 15.20    | 0.6   | 40Ar/39Ar | whole rock/trachyte                  | AG51-9-1; Vema Seamount                       | 39.47   | -6.22  | O'Connor & le Roex (1992)                                                                                                                                                                                                                                                |
| 15.30    | 2.2   | 40Ar/39Ar | plagioclase/altered lava             | SO84 68DS-1; Bonaparte Seamount               | 15.5    | -7     | O'Connor & le Roex (1992)                                                                                                                                                                                                                                                |
| 17.90    | 0.6   | 40Ar/39Ar | plagioclase/altered lava             | SO84 71DS-6; Bagration Seamount               | 15.36   | -6.5   | O'Connor & le Roex (1992)                                                                                                                                                                                                                                                |
| 18.00    | 1     | 40Ar/39Ar | plagioclase/altered lava             | SO84 72DS-2; Bagration Seamount               | 15.36   | -6.5   | O'Connor & le Roex (1992)                                                                                                                                                                                                                                                |
| 18.80    | 0.4   | 40Ar/39Ar | plagioclase/altered lava             | SO84 73DS-1; Bagration Seamount               | 15.36   | -6.5   | O'Connor & le Roex (1992)                                                                                                                                                                                                                                                |
| 18.80    | 0.4   | 40Ar/39Ar | whole rock/mugearite                 | AG51-12-3; RSA Seamount                       | 31.63   | 8.33   | O'Connor & le Roex (1992)                                                                                                                                                                                                                                                |
| 18.90    | 0.6   | 40Ar/39Ar | plagioclase/altered lava             | SO84 74DS-1; Bagration Seamount               | 15.36   | -6.5   | O'Connor & le Roex (1992)                                                                                                                                                                                                                                                |
| 28.40    | 1.2   | 40Ar/39Ar | whole rock/vesicular plag basalt     | All-93-3-1; Walvis Ridge                      | 37.1    | -7.78  | O'Connor & le Roex (1992)                                                                                                                                                                                                                                                |
| 30.80    | 0.8   | 40Ar/39Ar | whole rock/plag basalt/vesicular     | All-93-3-25; Walvis Ridge                     | 37.1    | -7.78  | O'Connor & le Roex (1992)                                                                                                                                                                                                                                                |
| 35.60    | 0.6   | 40Ar/39Ar | whole rock/alkali basalt             | All-93-8-11; Walvis Ridge                     | 34.5    | -3.48  | O'Connor & le Roex (1992)                                                                                                                                                                                                                                                |
| 38.00    | 0.4   | 40Ar/39Ar | whole rock/alkali-plag basalt        | All-93-7-1; Walvis Ridge                      | 34.5    | -3.63  | O'Connor & le Roex (1992)                                                                                                                                                                                                                                                |
| 38.20    | 2.2   | 40Ar/39Ar | whole rock/plag basalt vesicular     | All-93-5-3; Walvis Ridge                      | 34.29   | -5.02  | O'Connor & le Roex (1992)                                                                                                                                                                                                                                                |
| 43.20    | 4.2   | K-Ar      | whole rock/basalt                    | ESS-9; Espírito Santo                         | 19      | -39.2  | Fodor et al. (1984) K-Ar ages and the opening of the South Atlantic Ocean: basaltic rock from the Brazilian margin. Marine Geology, 54, M1–M8.                                                                                                                           |
| 44       | 1     | K-Ar      | whole rock/basalt                    | exploration well (CB-1) Abrolhos island       | 18.01   | -38.37 | Brazil. Journal of South American Earth Sciences, 18, 383–389.                                                                                                                                                                                                           |
| 49.10    | 2.2   | 40Ar/39Ar | plagioclase/basalt                   | BE-113; Benue                                 | -7.7    | 8.5    | Nigeria. Journal of the Geological Society, 152, 311–326.                                                                                                                                                                                                                |
| 49.20    | 11    | 40Ar/39Ar | whole rock/basalt                    | All-93-10-11; Walvis Ridge                    | 34.34   | -1.57  | Motions Over Plumes. Journal of Geophysical Reserch, 95, 17, 475–17, 502.                                                                                                                                                                                                |
| 50       | 7     | K-Ar      | whole rock/basalt                    | well (CB-1) Abrolhos island                   | 18.01   | -38.37 | Thomaz-Filho et al. (2005)                                                                                                                                                                                                                                               |
| 50.10    | 2     | K-Ar      | whole rock/tinguaite                 | SPK-097; Cabo Frio, Rio de Janeiro            | 23      | -42    | Amaral et al. (1967) Potassium-argon ages of alkaline rocks from Southern Brazil. Geochimica et Cosmochimica Acta, 31, 117–142.                                                                                                                                          |
| 50.30    | 0.8   | 40Ar/39Ar | whole rock/pl-basalt                 | V29-9-1; Walvis Ridge                         | 32.63   | 1.12   | O'Connor & Duncan (1990)                                                                                                                                                                                                                                                 |
| 52.80    | 2.1   | K-Ar      | groundmass/tinguaite                 | SPK-202; Cabo Frio, Rio de Janeiro            | 23      | -42    | Amaral et al. (1967)                                                                                                                                                                                                                                                     |
| 52.90    | 1.2   | 40Ar/39Ar | whole rock/altered trachyte          | AC-D-06, St Helena Seamount 6                 | 8.42    | 1.55   | O'Connor & le Roex (1992)                                                                                                                                                                                                                                                |
| 53       | 2     | K-Ar      | whole rock/basalt                    | well (CB-1) Abrolhos island                   | 18.01   | -38.37 | Thomaz-Filho et al. (2005)                                                                                                                                                                                                                                               |
| 54       | 2     | K-Ar      | whole rock/basalt                    | well (CB-1) Abrolhos island                   | 18.01   | -38.37 | Thomaz-Filho et al. (2005)                                                                                                                                                                                                                                               |
| 54.10    | 2.2   | K-Ar      | biotite/pulaskite                    | SPK-504; Cabo Frio, Rio de Janeiro            | 23      | -42    | Amaral et al. (1967)                                                                                                                                                                                                                                                     |
| 54.2     | 2     | K/Ar      | whole rock/tinguaite                 | KA1826 N/Poços de Caldas alkaline intrusion   | 21.54   | -48.32 | Brazil: geologic and geochronologic evidence. Revista Brasileira de Geociências, 32, 15–26.                                                                                                                                                                              |
| 54.3     | 3     | K/Ar      | Amphibole/nepheline syenite          | RAA 415/Poços de Caldas alkaline intrusion    | 21.54   | -48.32 | Ulbrich et al. (2002)                                                                                                                                                                                                                                                    |
| 55       | 11    | K-Ar      | whole rock/basalt                    | well (CB-1) Abrolhos island                   | 18.01   | -38.37 | Thomaz-Filho et al. (2005)                                                                                                                                                                                                                                               |
| 55       | 1     | Ar/Ar     | biotite/syenite                      | Nova Iguaçu                                   | 22.59   | 42     | unpublished data                                                                                                                                                                                                                                                         |
| 56.30    | 4     | 40Ar/39Ar | plagioclase/dolerite                 | BE-86; Benue                                  | -5.9    | 8      | Maluski et al. (1995)                                                                                                                                                                                                                                                    |
| 57.80    | 4.4   | K-Ar      | whole rock/wehrlite                  | BAS-33; Espírito Santo                        | 17.33   | -38.8  | Fodor et al. (1984)                                                                                                                                                                                                                                                      |
| 58.50    | 0.10  | 40Ar/39Ar | whole rock/basalt                    | BP-M-664 - Rio de Janeiro                     | 22.35   | 44.35  | Guedes et al. (2005) SAES K/Ar and 40Ar/39Ar ages of dykes emplaced in the on-shore basement of the Santos Basin, Resende area, SE Brazil: implications for the south Atlantic opening and Tertiary reactivation. Journal of South American Earth Sciences, 18, 371–182. |
| 59.90    | 4     | 40Ar/39Ar | whole rock/aphyric basalt            | All-93-14-19; Walvis Ridge                    | 32      | 2.39   | O'Connor & Duncan (1990)                                                                                                                                                                                                                                                 |
| 60.20    | 2     | 40Ar/39Ar | whole rock/vesicular basalt          | All-93-14-1; Walvis Ridge                     | 32      | 2.39   | O'Connor & Duncan (1990)                                                                                                                                                                                                                                                 |

|       |                |                                     |                                                      |       |                                                                                                                                                                                                                                                                                    |
|-------|----------------|-------------------------------------|------------------------------------------------------|-------|------------------------------------------------------------------------------------------------------------------------------------------------------------------------------------------------------------------------------------------------------------------------------------|
| 60.20 | 2.4 K-Ar       | alkali feldspar/malignite           | SPK-304, Casimiro de Abreu, Rio de Janeiro           | 22.5  | -42.2 Amaral et al. (1967)                                                                                                                                                                                                                                                         |
| 61.2  | 2 K/Ar         | KF/nepheline syenite                | KA1833/Poços de Caldas alkaline intrusion            | 21.54 | -48.32 Ulbrich et al. (2002)                                                                                                                                                                                                                                                       |
| 61.60 | 2.5 K-Ar       | whole rock/nepheline syenite        | SPK-230, Casimiro de Abreu, Rio de Janeiro           | 22.5  | -42.2 Amaral et al. (1967)                                                                                                                                                                                                                                                         |
| 61.7  | 2 K/Ar         | KF/nepheline syenite                | KA1833R /Poços de Caldas alkaline intrusion          | 21.54 | Ulbrich et al. (1991) Avaliação das idades K/Ar dos maciços alcalinos do Brasil sul-oriental e do Paraguai Oriental. Boletim do IG-USP: Série Especial, -48.32 9, 87-92.                                                                                                           |
| 62.00 | 2.6 40Ar/39Ar  | whole rock/vesicular basalt         | All-93-11-8; Walvis Ridge                            | 32.97 | 0 O'Connor & Duncan (1990)                                                                                                                                                                                                                                                         |
| 62.3  | 2 K/Ar         | KF/nepheline syenite                | KA1829 /Poços de Caldas alkaline intrusion           | 21.54 | -48.32 Ulbrich et al. (2002)                                                                                                                                                                                                                                                       |
| 63.00 | 3 40Ar/39Ar    | plagioclase/rhyolite dike           | BE-46; Benue                                         | -7    | 9 Maluski et al. (1995)                                                                                                                                                                                                                                                            |
| 63.6  | 2 K/Ar         | KF/nepheline syenite                | KA1822 /Poços de Caldas alkaline intrusion           | 21.54 | -48.32 Ulbrich et al. (2002)                                                                                                                                                                                                                                                       |
| 64.00 | 1.00 40Ar/39Ar | Plagioclase/ Phonolite              | BP-M-664; Rio de Janeiro                             | 22.35 | 44.35 Guedes et al. (2005)                                                                                                                                                                                                                                                         |
| 64    | 1 Ar/Ar        | amphibolesyenite                    | Morro de São João                                    | 22.48 | -43.29 unpublished data                                                                                                                                                                                                                                                            |
| 64.3  | 1 K/Ar         | whole rock/Tinguaité                | UC624 1/Poços de Caldas alkaline intrusion           | 21.54 | -48.32 Ulbrich et al. (2002)                                                                                                                                                                                                                                                       |
| 64.70 | 2.6 K-Ar       | whole rock/nepheline syenite        | SPK-186, Lajes, Santa Catarina                       | 27.87 | -55 Amaral et al. (1967)                                                                                                                                                                                                                                                           |
| 64.90 | 1.6 K-Ar       | whole rock/rock/alkali basalt sill  | Hole 524, Leg 73; DSDP, Walvis Ridge                 | 29.48 | Dietrich et al. (1984) Geochemistry of basalts from holes 519A, 520, 522B, and 524, Deep Sea Drilling Project Leg 73 (South Atlantic). In: Hsu, K. J., 3.51 LaBrecque, J. L. et al. (eds) Initial Reports of the DSDP, 73. US Government Printing Office, Washington, DC, 579-601. |
| 65    | 1 Ar/Ar        | biotita/syenite                     | Itatiaia                                             | 22.32 | -42.01 unpublished data                                                                                                                                                                                                                                                            |
| 65    | 1 Ar/Ar        | biotita/syenite                     | Ilha de Cabo Frio                                    | 22.49 | -42.37 unpublished data                                                                                                                                                                                                                                                            |
| 65.30 | 2.6 K-Ar       | whole rock/tinguaité                | SPK- 247, UC-624-1,1a; Poços de Caldas, Minas Gerais | 22.78 | -46.55 Amaral et al. (1967)                                                                                                                                                                                                                                                        |
| 65.4  | 1 K/Ar         | whole rock/Tinguaité                | Berk6241/Poços de Caldas alkaline intrusion          | 21.54 | -48.32 Ulbrich et al. (2002)                                                                                                                                                                                                                                                       |
| 65.4  | 2 K/Ar         | whole rock/Tinguaité                | JB PC 5 1 N /Poços de Caldas alkaline intrusion      | 21.54 | -48.32 Ulbrich et al. (2002)                                                                                                                                                                                                                                                       |
| 65.70 | 2.6 K-Ar       | biotite/nepheline syenite           | UC-2a; Itatiaia, Rio de Janeiro                      | 22.37 | -44.67 Amaral et al. (1967)                                                                                                                                                                                                                                                        |
| 66    | 1 K/Ar         | whole rock/Tinguaité                | UC6241a/Poços de Caldas alkaline intrusion           | 21.54 | -48.32 Ulbrich et al. (2002)                                                                                                                                                                                                                                                       |
| 66.2  | 3 K/Ar         | Amphibole/nepheline syenite         | RAA 413/Poços de Caldas alkaline intrusion           | 21.54 | -48.32 Ulbrich et al. (2002)                                                                                                                                                                                                                                                       |
| 66.3  | 3 K/Ar         | whole rock/Tinguaité                | RAA 417/Poços de Caldas alkaline intrusion           | 21.54 | -48.32 Ulbrich et al. (2002)                                                                                                                                                                                                                                                       |
| 66.70 | 2.7 K-Ar       | biotite/nepheline syenite           | SPK-030; Itatiaia, Rio de Janeiro                    | 22.37 | -44.67 Amaral et al. (1967)                                                                                                                                                                                                                                                        |
| 66.80 | 2.7 K-Ar       | feldspar/nepheline syenite          | SPK-231, Lajes, Santa Catarina                       | 27.83 | -50.3 Amaral et al. (1967)                                                                                                                                                                                                                                                         |
| 67    | 1 Ar/Ar        | amphibolesyenite                    | Tinguá                                               | 22.26 | -44.36 unpublished data                                                                                                                                                                                                                                                            |
| 67.2  | 3 K/Ar         | wr/dyke                             | São Sebastião Island                                 | 23.47 | Montes-Lauar et al. (1995) Late Cretaceous alkaline complexes, southeastern Brazil: paleomagnetism and geochronology. Earth and Planetary Science Letters, 134, 425-440.                                                                                                           |
| 67.80 | 2.7 K-Ar       | biotite,barkevite/nepheline syenite | SPK-045,-058; Itatiaia, Rio de Janeiro               | 22.4  | -44.67 Amaral et al. (1967)                                                                                                                                                                                                                                                        |
| 67.80 | 2.7 K-Ar       | biotite/nepheline syenite           | SPK-232; Tinguá, Rio de Janeiro                      | 22.58 | -43.4 Amaral et al. (1967)                                                                                                                                                                                                                                                         |
| 68.40 | 2.7 K-Ar       | biotite/quartz syenite              | SPK-081; Itatiaia, Rio de Janeiro                    | 22.37 | -44.7 Amaral et al. (1967)                                                                                                                                                                                                                                                         |
| 68.40 | 2.7 K-Ar       | feldspar/nepheline syenite          | SPK-185, Lajes, Santa Catarina                       | 27.83 | -50.22 Amaral et al. (1967)                                                                                                                                                                                                                                                        |
| 68.80 | 2.7 K-Ar       | biotite/syenite                     | SPK-044; Itatiaia, Rio de Janeiro                    | 22.33 | -44.73 Amaral et al. (1967)                                                                                                                                                                                                                                                        |
| 69.00 | 1.00 40Ar/39Ar | Biotite/ syenite                    | BP-IV-24a- Rio de Janeiro                            | 22.35 | 44.35 Guedes et al. (2005)                                                                                                                                                                                                                                                         |
| 69.70 | 0.4 40Ar/39Ar  | biotite/alkali basalt dike          | RJ-7560; Rio de Janeiro                              | 22.62 | Deckart et al., (1998) New time constraints on dyke swarms related to the Parana-Etendeka magmatic province, and subsequent South Atlantic -43.66 opening, southeastern Brazil. Journal of Volcanology and Geothermal Research, 80, 67-83.                                         |
| 69.70 | 2.8 K-Ar       | Alkali feldspar/nepheline syenite   | SPK-270; Rio Bonito, Rio de Janeiro                  | 22.7  | -42.6 Amaral et al. (1967)                                                                                                                                                                                                                                                         |
| 70.00 | 1.00 40Ar/39Ar | Plagioclase/ syenite                | BP-IV-24a - Rio de Janeiro                           | 22.35 | 44.35 Guedes et al. (2005)                                                                                                                                                                                                                                                         |
| 70.00 | 0.10 40Ar/39Ar | Plagioclase/ syenite                | BP-IV-24a - Rio de Janeiro                           | 22.35 | 44.35 Guedes et al. (2005)                                                                                                                                                                                                                                                         |
| 71    | 1 Ar/Ar        | amphibolesyenite                    | Morro Redondo                                        | 22.36 | -43.28 unpublished data                                                                                                                                                                                                                                                            |
| 71.1  | 2 K/Ar         | whole rock/Tinguaité                | JB PC 5 3 N /Poços de Caldas alkaline intrusion      | 21.54 | -48.32 Ulbrich et al. (2002)                                                                                                                                                                                                                                                       |
| 71.50 | 7 K-Ar         | whole rock/basalt                   | RJS-87; Campos                                       | 21.83 | -41 Fodor et al. (1984)                                                                                                                                                                                                                                                            |
| 71.7  | 3 K/Ar         | KF/nepheline syenite                | RAA 415/Poços de Caldas alkaline intrusion           | 21.54 | -48.32 Ulbrich et al. (2002)                                                                                                                                                                                                                                                       |
| 72.30 | 2.9 K-Ar       | Alkali feldspar/nepheline syenite   | SPK-507; Rio Bonito, Rio de Janeiro                  | 22.7  | -42.6 Amaral et al. (1967)                                                                                                                                                                                                                                                         |
| 72.4  | 3 K/Ar         | KF/nepheline syenite                | RAA 419/Poços de Caldas alkaline intrusion           | 21.54 | -48.32 Ulbrich et al. (2002)                                                                                                                                                                                                                                                       |
| 72.50 | 1 40Ar/39Ar    | biotite/alkali basalt dike          | RJ-7583; Rio de Janeiro                              | 22.86 | -43.73 Deckart et al. (1998)                                                                                                                                                                                                                                                       |
| 72.70 | 2.9 K-Ar       | K-spar,groundmass/tinguaité         | SPK-223,-224; Pico Marapicu, Rio de Janeiro          | 22.85 | -43.45 Amaral et al. (1967)                                                                                                                                                                                                                                                        |
| 73.20 | 2.9 K-Ar       | barkevite/nepheline syenite         | SPK-234; Pico Marapicu, Rio de Janeiro               | 22.85 | -43.45 Amaral et al. (1967)                                                                                                                                                                                                                                                        |
| 73.60 | 3.2 K-Ar       | whole rock/tholeiitic basalt sill   | Hole 524, Leg 73; DSDP; Walvis Ridge                 | 29.48 | 3.51 Dietrich et al. (1984)                                                                                                                                                                                                                                                        |
| 74    | 1 Ar/Ar        | amphibolesyenite                    | Marapicu                                             | 22.29 | -44.19 unpublished data                                                                                                                                                                                                                                                            |
| 74.2  | 2 K/Ar         | whole rock/Tinguaité                | JB PC 4 8 N /Poços de Caldas alkaline intrusion      | 21.54 | -48.32 Ulbrich et al. (2002)                                                                                                                                                                                                                                                       |
| 74.5  | 2 K/Ar         | whole rock/Tinguaité                | JB PC 4 4 N /Poços de Caldas alkaline intrusion      | 21.54 | -48.32 Ulbrich et al. (2002)                                                                                                                                                                                                                                                       |
| 74.90 | 3 K-Ar         | barkevite/nepheline syenite         | SPK-191; Pico Marapicu, Rio de Janeiro               | 22.85 | -43.45 Amaral et al. (1967)                                                                                                                                                                                                                                                        |
| 74.9  | 2 K/Ar         | whole rock/Tinguaité                | JB PC 5/Poços de Caldas alkaline intrusion           | 21.54 | -48.32 Ulbrich et al. (2002)                                                                                                                                                                                                                                                       |
| 75.00 | 3 K-Ar         | barkevite/nepheline syenite         | SPK-171; Pico Marapicu, Rio de Janeiro               | 22.85 | -43.45 Amaral et al. (1967)                                                                                                                                                                                                                                                        |
| 75    | 1 K/Ar         | whole rock/Tinguaité                | JB PC 3 8 /Poços de Caldas alkaline intrusion        | 21.54 | -48.32 Ulbrich et al. (2002)                                                                                                                                                                                                                                                       |
| 75.20 | 4.4 K-Ar       | whole rock/basalt                   | RJS-33; Campos                                       | 23.83 | -42.8 Fodor et al. (1984)                                                                                                                                                                                                                                                          |
| 75.4  | 3 K/Ar         | Amphibole/nepheline syenite         | RAA 414/Poços de Caldas alkaline intrusion           | 21.54 | -48.32 Ulbrich et al. (2002)                                                                                                                                                                                                                                                       |
| 75.5  | 3 K/Ar         | KF/nepheline syenite                | RAA 419/Poços de Caldas alkaline intrusion           | 21.54 | -48.32 Ulbrich et al. (2002)                                                                                                                                                                                                                                                       |
| 75.7  | 2 K/Ar         | whole rock/Tinguaité                | JA1820R /Poços de Caldas alkaline intrusion          | 21.54 | -48.32 Ulbrich et al. (2002)                                                                                                                                                                                                                                                       |
| 76    | 2 K/Ar         | whole rock/Tinguaité                | KA1820 /Poços de Caldas alkaline intrusion           | 21.54 | -48.32 Ulbrich et al. (2002)                                                                                                                                                                                                                                                       |
| 76.9  | 1 K/Ar         | whole rock/Tinguaité                | JB PC 3 8/Poços de Caldas alkaline intrusion         | 21.54 | -48.32 Ulbrich et al. (2002)                                                                                                                                                                                                                                                       |
| 77.00 | 3 K-Ar         | wholerock/tinguaité                 | SPK-051; Poços de Caldas, Minas Gerais               | 21.9  | -46.57 Amaral et al. (1967)                                                                                                                                                                                                                                                        |
| 77.1  | 2 K/Ar         | whole rock/Ankaramite               | JB PC 2 8 /Poços de Caldas alkaline intrusion        | 21.54 | -48.32 Ulbrich et al. (2002)                                                                                                                                                                                                                                                       |

|       |                |                                         |                                                                |       |                                                                                                                                                                                    |
|-------|----------------|-----------------------------------------|----------------------------------------------------------------|-------|------------------------------------------------------------------------------------------------------------------------------------------------------------------------------------|
| 77.5  | 2 K/Ar         | whole rock/Ankaramite                   | JB PC 2 9 /Poços de Caldas alkaline intrusion                  | 21.54 | -48.32 Ulbrich et al. (2002)                                                                                                                                                       |
| 77.6  | 7.8 K/Ar       | biotita/alkaline rock                   | São Sebastião Island                                           | 23.47 | -45.17 Montes-Lauar et al. (1995)                                                                                                                                                  |
| 78    | 3 K/Ar         | KF/nepheline syenite                    | RAA 418/Poços de Caldas alkaline intrusion                     | 21.54 | -48.32 Ulbrich et al. (2002)                                                                                                                                                       |
| 78.20 | 1 40Ar/39Ar    | whole rock/mod altered olivine basalt   | AC-D-05A; St Helena Seamount 5                                 | 4.28  | 4.47 O'Connor & le Roex (1992)                                                                                                                                                     |
| 78.20 | 3 K-Ar         | whole rock/tinguaite                    | SPK-287; Poços de Caldas, Minas Gerais                         | 21.87 | -46.45 Amaral et al. (1967)                                                                                                                                                        |
| 78.2  | 1 K/Ar         | whole rock/Tinguaite                    | JB PC 2 4 /Poços de Caldas alkaline intrusion                  | 21.54 | -48.32 Ulbrich et al. (2002)                                                                                                                                                       |
| 78.2  | 3 K/Ar         | KF/nepheline syenite                    | RAA 416/Poços de Caldas alkaline intrusion                     | 21.54 | -48.32 Ulbrich et al. (2002)                                                                                                                                                       |
| 78.4  | 2 K/Ar         | whole rock/Ankaramite                   | JB PC 1 7 /Poços de Caldas alkaline intrusion                  | 21.54 | -48.32 Ulbrich et al. (2002)                                                                                                                                                       |
| 78.80 | 5.6 40Ar/39Ar  | biotite/alkali basalt dike              | RJ-7581; Rio de Janeiro                                        | 22.86 | -43.73 Deckart et al. (1998)                                                                                                                                                       |
| 79.10 | 12.6 40Ar/39Ar | whole rock/phyric pl-basalt             | DSDP 74-528-40-5, 70-75; Walvis Ridge                          | 28.53 | 2.32 O'Connor & Duncan (1990)                                                                                                                                                      |
| 79.10 | 1.8 40Ar/39Ar  | whole rock/mod altered basalt           | AC-D-02E; St Helena Seamount 2                                 | 2.32  | 4.77 O'Connor & le Roex (1992)                                                                                                                                                     |
| 80    | 1 K/Ar         | nepheline syenite                       | Passa Quatro intrusion                                         | 22.5  | -43.35 unpublished data                                                                                                                                                            |
| 80.40 | 1 40Ar/39Ar    | whole rock/mod altered trachyte         | AC-D-02H, St Helena Seam 2                                     | 2.32  | 4.77 O'Connor & le Roex (1992)                                                                                                                                                     |
| 80.60 | 3.2 K-Ar       | biotite/essexite                        | SPK-140; Ilha de São Sebastião, São Paulo                      | 23.77 | -45.35 Amaral et al. (1967)                                                                                                                                                        |
| 81    | 3 K/Ar         | whole rock/Tinguaite                    | RAA 418/Poços de Caldas alkaline intrusion                     | 21.54 | -48.32 Ulbrich et al. (2002)                                                                                                                                                       |
| 81.10 | 2.2 40Ar/39Ar  | plagioclase/hypovolcanic intrusion      | BN-02; Benue                                                   | -6    | 7.7 Maluski et al. (1995)                                                                                                                                                          |
| 81.60 | 1.4 40Ar/39Ar  | whole rock/mod altered trachyte         | AC-D-02B, St Helena Seam 2                                     | 2.32  | 4.77 O'Connor & le Roex (1992)                                                                                                                                                     |
| 81.70 | 3.2 K-Ar       | biotite/tinguaite                       | UC-624-26; Ilha de São Sebastião, São Paulo                    | 23.77 | -45.35 Amaral et al. (1967)                                                                                                                                                        |
| 81.80 | 3.6 40Ar/39Ar  | biotite/alkali basalt dike              | RJ-7578; Rio de Janeiro                                        | 22.86 | -43.73 Deckart et al. (1998)                                                                                                                                                       |
| 81.80 | 3.2 K-Ar       | biotite/rhomb porphyry                  | SPK-227; Ilha Montao de Trigo, São Paulo                       | 23.88 | -45.78 Amaral et al. (1967)                                                                                                                                                        |
| 81.90 | 3.2 K-Ar       | K-feldspar/nepheline syenite            | SPK-225; Ilha Montao de Trigo, São Paulo                       | 23.88 | -45.78 Amaral et al. (1967)                                                                                                                                                        |
| 82.00 | 3.8 40Ar/39Ar  | whole rock/aphyric tholeiitic basalt    | DSDP 74-525-57-5, 104-106; Walvis Ridge                        | 29.07 | 2.99 O'Connor & Duncan (1990)                                                                                                                                                      |
| 82    | 2 K/Ar         | whole rock/Tinguaite                    | JB PC 3 6 N/Poços de Caldas alkaline intrusion                 | 21.54 | -48.32 Ulbrich et al. (2002)                                                                                                                                                       |
| 82.30 | 0.2 40Ar/39Ar  | plagioclase/alkaline dolerite dike      | RJ-7584; Rio de Janeiro                                        | 22.86 | -43.73 Deckart et al. (1998)                                                                                                                                                       |
| 82.30 | 3.3 K-Ar       | biotite/nepheline syenite               | SPK-052; Poços de Caldas, Minas Gerais                         | 21.78 | -46.65 Amaral et al. (1967)                                                                                                                                                        |
| 82.3  | 1 K/Ar         | Biotite/nepheline syenite               | JB PC 1 2 /Poços de Caldas alkaline intrusion                  | 21.54 | -48.32 Ulbrich et al. (2002)                                                                                                                                                       |
| 82.4  | 2 K/Ar         | whole rock/Tinguaite                    | JB PC 3 1 S /Poços de Caldas alkaline intrusion                | 21.54 | -48.32 Ulbrich et al. (2002)                                                                                                                                                       |
| 82.5  | 3 K/Ar         | Amphibole/nepheline syenite             | RAA 420/Poços de Caldas alkaline intrusion                     | 21.54 | -48.32 Ulbrich et al. (2002)                                                                                                                                                       |
| 82.7  | 2 K/Ar         | Biotite/nepheline syenite               | KA 1832 /Poços de Caldas alkaline intrusion                    | 21.54 | -48.32 Ulbrich et al. (2002)                                                                                                                                                       |
| 82.8  | 6.2 K/Ar       | wr/dyke                                 | São Sebastião Island                                           | 23.47 | -45.17 Montes-Lauar et al. (1995)                                                                                                                                                  |
| 82.9  | 2 K/Ar         | whole rock/Tinguaite                    | KA1821 S /Poços de Caldas alkaline intrusion                   | 21.54 | -48.32 Ulbrich et al. (2002)                                                                                                                                                       |
| 82.9  | 0.1 Ar/Ar      | biotita/alkali feldspar syenite         | 7/Cananéia alkaline intrusion                                  | 25.01 | Spinelli & Gomes (2008) A ocorrência alcalina de Cananéia, litoral sul do estado de São Paulo: geologia e geocronologia. Boletim Geologia USP: Série Científica, 8, 1–13.          |
| 82.9  | 0.2 Ar/Ar      | biotita/alkali feldspar syenite         | 7/Cananéia alkaline intrusion                                  | 25.01 | -47.55 Spinelli & Gomes (2008)                                                                                                                                                     |
| 83    | 0.3 K/Ar       | biotita/monzonite                       | rga-18d/Ponte Nova alkaline intrusion                          | 22.47 | -45.45 Azzone et al. 2009 Geologia e Geocronologia do Maciço Alcalino Máfico-Ultramáfico Ponte Nova (SP-MG). Geologia USP, 9, 23–46.                                               |
| 83    | 0.2 Ar/Ar      | biotita/alkali feldspar syenite         | 29/Cananéia alkaline intrusion                                 | 25.01 | -47.55 Spinelli & Gomes (2008)                                                                                                                                                     |
| 83.10 | 2 40Ar/39Ar    | plagioclase/basalt                      | BE-320; Benue                                                  | -6.8  | 8.5 Maluski et al. (1995)                                                                                                                                                          |
| 83.10 | 3.3 K-Ar       | biotite, potassium feldspar/syenite     | SPK-177,-178; Ilha de São Sebastião, São Paulo                 | 23.77 | -45.35 Amaral et al. (1967)                                                                                                                                                        |
| 83.20 | 3 40Ar/39Ar    | K-feldspar/lamprophyre dike             | BN-08; Benue                                                   | -6.8  | 8.5 Maluski et al. (1995)                                                                                                                                                          |
| 83.3  | 0.5 Ar/Ar      | biotita/quartzo alkali feldspar syenite | 36/Cananéia alkaline intrusion                                 | 25.01 | -47.55 Spinelli & Gomes (2008)<br>Gibson et al. (1995) The Late Cretaceous impact of the Trindade mantle plume: evidence for large-volume, mafic, potassic magmatism in SE Brazil. |
| 83.60 | 1.6 K-Ar       | phlogopite/potassic mafic intrusion     | 915B31, Mata do Lenco, Alto Paranaíba Igneous Province         | 18.28 | -47.42 Journal of Petrology, 26, 189–229.                                                                                                                                          |
| 83.60 | 2.8 K-Ar       | phlogopite/potassic mafic lava          | 92SOB100a, Carmo do Paranaíba, Alto Paranaíba Igneous Province | 18.9  | -46.16 Gibson et al. (1995)                                                                                                                                                        |
| 83.6  | 0.5 Ar/Ar      | biotita/alkali feldspar syenite         | 7/Cananéia alkaline intrusion                                  | 25.01 | -47.55 Spinelli & Gomes (2008)                                                                                                                                                     |
| 83.70 | 3.6 K-Ar       | biotite/peridotite                      | SPK-189,-,228; Serra Negra, Minas Gerais                       | 18.92 | -46.83 Amaral et al. (1967)                                                                                                                                                        |
| 83.8  | 0.7 Ar/Ar      | biotita/quartz alkali feldspar syenite  | 9a/Cananéia alkaline intrusion                                 | 25.01 | -47.55 Spinelli & Gomes (2008)                                                                                                                                                     |
| 83.9  | 0.4 Ar/Ar      | biotita/quartz alkali feldspar syenite  | 36/Cananéia alkaline intrusion                                 | 25.01 | -47.55 Spinelli & Gomes (2008)                                                                                                                                                     |
| 84    | 2.2 Ar/Ar      | biotita/quartz alkali feldspar syenite  | 9a/Cananéia alkaline intrusion                                 | 25.01 | -47.55 Spinelli & Gomes (2008)                                                                                                                                                     |
| 84.1  | 0.2 Ar/Ar      | biotita/quartz alkali feldspar syenite  | 36/Cananéia alkaline intrusion                                 | 25.01 | -47.55 Spinelli & Gomes (2008)                                                                                                                                                     |
| 84.40 | 2.4 40Ar/39Ar  | plagioclase/hypovolcanic intrusion      | BN-03; Benue                                                   | -6    | 7.7 Maluski et al. (1995)                                                                                                                                                          |
| 84.60 | 3.6 K-Ar       | barkevikite/nordmarkite                 | SPK-110,-225,-083; Cananéia, São Paulo                         | 25.01 | -47.75 Amaral et al. (1967)                                                                                                                                                        |
| 84.90 | 3.4 K-Ar       | biotite/syenite                         | SPK-035; Ilha de São Sebastião, SP                             | 23.77 | -45.35 Amaral et al. (1967)                                                                                                                                                        |
| 84.9  | 0.7 Ar/Ar      | biotita/alkali feldspar syenite         | 29/Cananéia alkaline intrusion                                 | 25.01 | -47.55 Spinelli & Gomes (2008)                                                                                                                                                     |
| 85.5  | 3 K/Ar         | Pyroxene                                | VL3 1161/Poços de Caldas alkaline intrusion                    | 21.54 | -48.32 Ulbrich et al. (2002)                                                                                                                                                       |
| 85.6  | 0.4 Ar/Ar      | biotita/alkali feldspar syenite         | 29/Cananéia alkaline intrusion                                 | 25.01 | -47.55 Spinelli & Gomes (2008)                                                                                                                                                     |
| 85.70 | 2.4 40Ar/39Ar  | K-feldspar/syenite                      | BN-07; Benue                                                   | -6.8  | 8.5 Maluski et al. (1995)                                                                                                                                                          |
| 86.5  | 3 K/Ar         | whole rock/Phonolite                    | MZ /Poços de Caldas alkaline intrusion                         | 21.54 | -48.32 Ulbrich et al. (2002)                                                                                                                                                       |
| 86.7  | 3 K/Ar         | biotita/olivine-melanogabbro            | rga-58b/Ponte Nova alkaline intrusion                          | 22.47 | -45.45 Azzone et al. 2009                                                                                                                                                          |
| 86.8  | 2.9 K/Ar       | biotita/monzodiorite                    | rga-26/Ponte Nova alkaline intrusion                           | 22.47 | -45.45 Azzone et al. 2009                                                                                                                                                          |
| 87.20 | 17.8 40Ar/39Ar | whole rock/phyric basalt DSDP           | 516F-128-1, 22-24; Rio Grande Rise                             | 30.28 | -35.29 O'Connor & Duncan (1990)                                                                                                                                                    |

|        |               |                                    |                                               |       |        |                                                                                                                                                                                                                                                                                          |
|--------|---------------|------------------------------------|-----------------------------------------------|-------|--------|------------------------------------------------------------------------------------------------------------------------------------------------------------------------------------------------------------------------------------------------------------------------------------------|
| 87.6   | 3.6 K/Ar      | biotita/monzogabbro                | rga-83/Ponte Nova alkaline intrusion          | 22.47 | -45.45 | Azzone et al. 2009                                                                                                                                                                                                                                                                       |
| 87.70  | 2 40Ar/39Ar   | plagioclase/hypovolcanic intrusion | BE-804; Benue                                 | -6    | 7.7    | Maluski et al. (1995)                                                                                                                                                                                                                                                                    |
| 89.3   | 2 K/Ar        | whole rock/Ankaramite              | JB PC 1 0 /Poços de Caldas alkaline intrusion | 21.54 | -48.32 | Ulbrich et al. (2002)                                                                                                                                                                                                                                                                    |
| 91.20  | 2.2 40Ar/39Ar | whole rock/mugearite               | AG51-11-10; 7o East Seamount                  | 37    | 7      | O'Connor & le Roex (1992)                                                                                                                                                                                                                                                                |
| 92.00  | 3 40Ar/39Ar   | K-feldspar/rhyolite dike           | BE-41; Benue                                  | -7.5  | 9.3    | Maluski et al. (1995)                                                                                                                                                                                                                                                                    |
| 95.30  | 2 40Ar/39Ar   | K-feldspar/phonolite dike          | BE-22; Benue                                  | -6.8  | 8.5    | Maluski et al. (1995)                                                                                                                                                                                                                                                                    |
|        |               |                                    |                                               |       |        | Nascimento & Souza (2009) Granito do Cabo de Santo Agostinho, PE Uma rara ocorrência de granito cretáceo no Brasil. In: Winge, M., Schobbenhaus, C., Souza, C. R. G., Fernandes, A. C. S., Queiroz, E. T., Berbert-Born, M. & Campos, D. A. (eds) Sítios Geológicos e Paleontológicos do |
| 101.80 | 0.5 40Ar/39Ar | feldspar                           | Cabo de Santo Agostinho, PE                   | 8.21  | -34.56 | Brasil. CPRM, Brasília, 2, 225–236. <a href="http://sigep.cprm.gov.br/sitio111/sitio111_impresso.pdf">http://sigep.cprm.gov.br/sitio111/sitio111_impresso.pdf</a>                                                                                                                        |
| 102.10 | 1.5 40Ar/39Ar | biotite                            | Cabo de Santo Agostinho, PE                   | 8.21  | -34.56 | Nascimento & Souza (2009)                                                                                                                                                                                                                                                                |
| 103.00 | 3 40Ar/39Ar   | amphibol                           | Cabo de Santo Agostinho, PE                   | 8.21  | -34.56 | Nascimento & Souza (2009)                                                                                                                                                                                                                                                                |
